# Supplementary material for: Enhanced electrostatic shielding effect through incorporation of trace amounts of highly chelating anions for establishing a more stable electric double layer
Source: Royal Society of Chemistry journal article supplement (doi:10.1039/d4ta02193b), 2024-01-01
Supplement: d4ta02193b1.pdf [file d4ta02193b1.pdf]

Supplementary Information

**Enhanced electrostatic shielding effect through  
incorporation of trace amounts of highly chelating anions  
for establishing a more stable electric double layer**

Minghui Wang,<sup>a</sup> Junyi Yin,<sup>a</sup> Xiang Feng,<sup>a</sup> Fuxiang Li,<sup>a</sup> Zhuo Li,<sup>a</sup> Wen Zhang,<sup>b</sup>

Yonghong Cheng,<sup>a\*</sup> and Xin Xu<sup>a\*</sup>

<sup>a</sup> State Key Laboratory of Electrical Insulation and Power Equipment, School of Electrical Engineering, Xi'an Jiaotong University, Xi'an 710049, PR China

<sup>b</sup> School of Chemistry, Xi'an Jiaotong University, Xi'an 710049, PR China

\*Corresponding authors.

E-mail addresses: cyh@xjtu.edu.cn (Y. Cheng), xu.xin@xjtu.edu.cn (X. Xu).

## Experimental Section

### 1. The Preparation of the Electrolyte

Pure  $\text{ZnSO}_4$  electrolyte ( $2 \text{ mol L}^{-1}$ ) was prepared by dissolving 5751.2 mg of  $\text{ZnSO}_4 \cdot 7\text{H}_2\text{O}$  (98%, Aladdin) into 10 ml of deionized (DI) water. The IDHA-x electrolyte ( $x=0.02 \ 0.1 \ 0.5$ ) was prepared by adding 5751.2 mg of  $\text{ZnSO}_4 \cdot 7\text{H}_2\text{O}$  and  $3371 \cdot x$  mg of IDHA (AR, Aladdin) into 10 ml of deionized water (DI). The optimized concentration discussed in this paper is  $0.02 \text{ mol L}^{-1}$  and marked as “With IDHA”, unless otherwise stated. And the “With  $\text{Na}_2\text{SO}_4$ ” electrolyte was prepared by adding 5751.2 mg of  $\text{ZnSO}_4 \cdot 7\text{H}_2\text{O}$  and 56.8 mg of  $\text{Na}_2\text{SO}_4$  (99.5%, Tokyo Chemical Industry) into 10 ml of DI.

In order to research the chelating ability of IDHA anion, we prepared four different solution——Solution A ( $0.02 \text{ mol L}^{-1}$  IDHA +  $0.04 \text{ mol L}^{-1}$   $\text{H}_2\text{SO}_4$ ), Solution B ( $0.04 \text{ mol L}^{-1}$   $\text{Na}_2\text{SO}_4$ ), Solution C ( $0.02 \text{ mol L}^{-1}$  IDHA +  $0.04 \text{ mol L}^{-1}$   $\text{H}_2\text{SO}_4$  +  $2 \text{ mol L}^{-1}$   $\text{ZnSO}_4$ ), and Solution D ( $0.04 \text{ mol L}^{-1}$   $\text{Na}_2\text{SO}_4$  +  $2 \text{ mol L}^{-1}$   $\text{ZnSO}_4$ ) electrolytes were prepared in the similar process but replace DI to heavy water (99.9 atom % D, Meryer).

The electrolyte for  $\text{Zn}/\delta\text{-MnO}_2$  full cells were added with an extra  $0.1 \text{ mol L}^{-1}$   $\text{MnSO}_4$  (AR, Macklin).

### 2. Synthesis of Cathode Materials

The  $\delta\text{-MnO}_2$  were synthesized hydrothermally using  $\text{KMnO}_4$  as reactants in aqueous solution [1]. 316 mg of  $\text{KMnO}_4$  (AR, Sinopharm Chemical Reagent Co., Ltd) and 35 mL of DI water were mixed to form a uniform suspension. The mixture was

stirred and sonicated for 30 min and then transferred to a 50 mL Teflon-lined autoclave. The autoclave was placed in an oven at 180 °C for 3 h, and a brownish precipitate was collected via high-speed centrifugation at 8000 rpm. The precipitate was washed several times with DI water and ethanol and oven-dried at 60 °C to finally obtain the  $\delta$ -MnO<sub>2</sub>.

The NH<sub>4</sub>V<sub>4</sub>O<sub>10</sub> powders were synthesized by a hydrothermal method [2]. In detail, 0.585 g of ammonium vanadate (NH<sub>4</sub>VO<sub>3</sub>, 99%, Aladdin) was added into 35 mL DI water. Then 0.9455 g oxalic acid (H<sub>2</sub>C<sub>2</sub>O<sub>4</sub>·2H<sub>2</sub>O, 99%, Meryer) powders were added into the NH<sub>4</sub>VO<sub>3</sub> solution under magnetically stirring. The solution was transferred to a 50 mL Teflon-lined autoclave and heated at 140 °C for 12 h. After cooling, the products were collected by centrifugation and washed with DI water, then dried at 70 °C overnight to finally obtain the NH<sub>4</sub>V<sub>4</sub>O<sub>10</sub> powders.

### **3. The Preparation of the Electrode**

For full batteries: The polished Zn foil was used as the anode. And preparing the cathode of a full cell by coating slurry made of cathode materials onto a stainless-steel foil. The slurry was prepared by mixing as-prepared active materials, super P, and polyvinylidene fluoride (PVDF) in a mass ratio of 7: 2: 1 with certain amounts of N-methyl-2-pyrrolidone (NMP). Then the working electrode was prepared by coating the slurry on the stainless foil and dried at 80 °C under vacuum for 12 h. The mass loading of the materials was about 1-2 mg cm<sup>-2</sup>.

### **4. Characterizations**

Scanning electron microscope (SEM; ZEISS, Gemini 500) was used to acquire the morphology of materials and elemental mapping images. X-ray diffraction (XRD) patterns were recorded by Bruker D8 Advance with a Cu K $\alpha$  radiation ( $\lambda=1.54184$  Å) from 5° to 90°. The solvation shells of Zn<sup>2+</sup> and Na<sup>+</sup> in various solutions were studied by liquid-state nuclear magnetic resonance (NMR; JNM-ECZ400S/L1) and Raman microscope (InVia Qontor).

## 5. Electrochemical Measurements

All testing CR2025-type coin cells were assembled in an open-air environment by using glass fiber filter (Whatman) as the separator. The electrolyte amount used in coin cells was 50  $\mu$ L. The electrochemical performance of the batteries in this work was evaluated on a NEWARE CT-4008T battery test system. Symmetrical cells were fabricated by using two identical Zn foil ( $\phi=16$  mm, with thickness is 0.1 mm,). Zn//Cu half cells were assembled with Cu foil as the working electrode and Zn foil as the reference and counter electrode. Zn//MnO<sub>2</sub> or Zn//NH<sub>4</sub>V<sub>4</sub>O<sub>10</sub> full cells were assembled using Zn foil as anode and  $\delta$ -MnO<sub>2</sub> or NH<sub>4</sub>V<sub>4</sub>O<sub>10</sub> as cathode. To assemble pouch cells, cathodes ( $3 \times 3$  cm<sup>2</sup>) were coupled with the Zn anodes ( $3 \times 3$  cm<sup>2</sup>). Glass fiber filter was used as the separator ( $4 \times 4$  cm<sup>2</sup>).

For long-term cycling performance of Zn//Zn symmetric cells ( $x$  mA cm<sup>-2</sup>  $y$  mAh cm<sup>-2</sup>), constant current densities were applied as  $x$  mA cm<sup>-2</sup> and the charging and discharging times were set to be  $\frac{y}{x}$  h. For Zn//MnO<sub>2</sub> full cells, the voltage range was 0.8-1.8 V under different current densities (range from 0.5, 1, 2, 5, 10 A g<sup>-1</sup>). For

Zn//NH<sub>4</sub>V<sub>4</sub>O<sub>10</sub> full cells, the voltage range was 0.8-1.8 V under different current densities (range from 1, 5A g<sup>-1</sup>)

The cyclic voltammetry (CV), linear scan voltammetry (LSV), corrosion test (TAF), chronoamperograms (CA), electrochemical impedance spectroscopy (EIS) and differential capacitance-potential curve were carried out on an electrochemical workstation (CHI 760E, CH Instruments, Ins) with a three-electrode system (For Zn//Cu half cells, Cu foil works as the working electrode and Zn foil as the reference and counter electrode). For Zn//MnO<sub>2</sub> full cells, CV was tested in the voltage range of 0.8-1.8 V (vs. Zn<sup>2+</sup>/Zn) at a scan rate of 0.2 mV s<sup>-1</sup>. For Zn//NH<sub>4</sub>V<sub>4</sub>O<sub>10</sub> full cells, CV was tested in the voltage range of 0.3-1.4 V (vs. Zn<sup>2+</sup>/Zn) at a scan rate of 0.2 mV s<sup>-1</sup>. Electric double layer capacitance (EDLC) measurements for CV curves of Zn//Zn symmetric cells at a scan rate of 8-16 mV s<sup>-1</sup> between -15 to 15 mV, and calculated through the equation  $C = i/v$  (C: capacitance;  $i$ : current. The value of  $i$  was determined by taking the half of the current difference between positive and negative scan under each scanning rate). LSV curves were measured at a scan rate of 2 mV s<sup>-1</sup> from 0.05 V to -3 V (vs. Zn<sup>2+</sup>/Zn). Tafel plots were measured by scanning between -0.15 and 0.15 V (vs. Zn<sup>2+</sup>/Zn) at 2 mV s<sup>-1</sup>. The CA tests were measured based on the Zn//Zn cell at a fixed overpotential of -150 mV. EIS spectra were recorded with a frequency ranging from 0.01 Hz to 10<sup>5</sup> Hz. The differential capacitance-potential curves were carried out through IMPE method in Zn//Cu cells at the frequency is 6 Hz and the amplitude (A) is 5 mV with potential ranging from 0.7 V to 0.1 V (vs. Zn/Zn<sup>2+</sup>).

## Supplementary Tables and Figures:

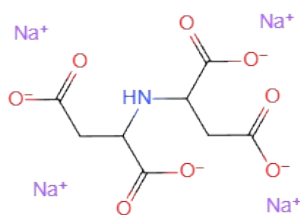

**Fig. S1.** The structure of EDTA (tetrasodium,2-(1,2-dicarboxylatoethylamino) butanedioate).

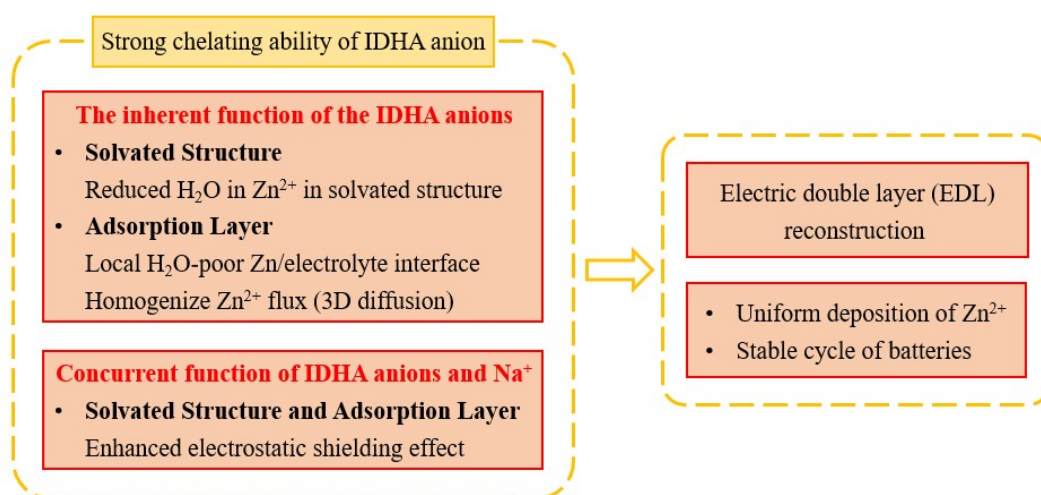

**Fig. S2.** Detailed schematic illustration of the multiple-function IDHA electrolyte.

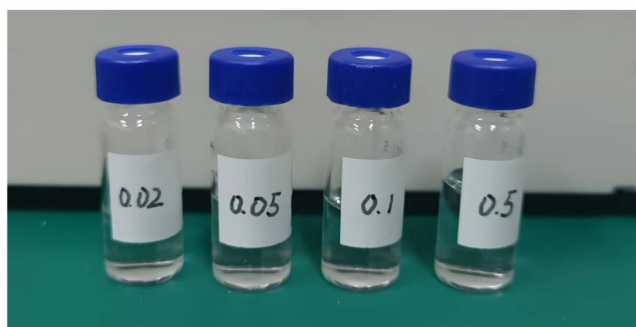

**Fig. S3.** Clear solutions of IDHA with four different concentrations (25 °C). This reveal the excellent water solubility and dispersibility of IDHA.

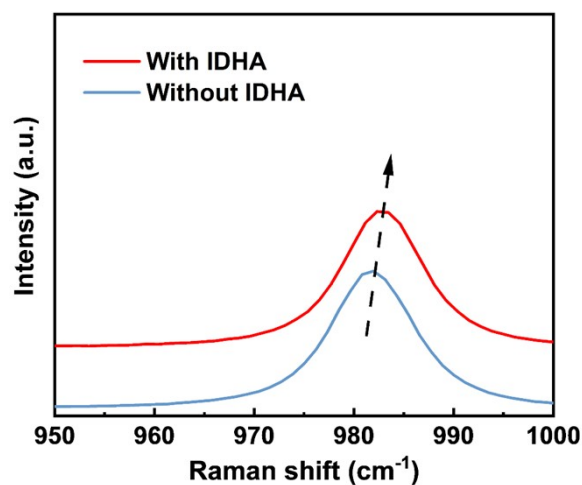

**Fig. S4.** The impact of IDHA usage on Raman spectroscopy. This phenomenon demonstrates the alteration of solvation structure by IDHA, but it remains unclear which ions' solvation structure undergoes changes.

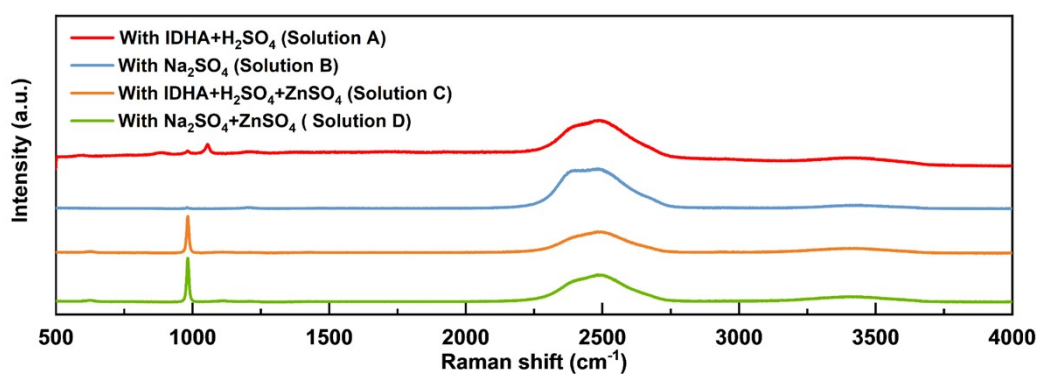

**Fig. S5.** Raman spectra of four different solutions—Solution A ( $0.02 \text{ mol L}^{-1}$  IDHA +  $0.04 \text{ mol L}^{-1} \text{ H}_2\text{SO}_4$ ), Solution B ( $0.04 \text{ mol L}^{-1} \text{ Na}_2\text{SO}_4$ ), Solution C ( $0.02 \text{ mol L}^{-1}$  IDHA +  $0.04 \text{ mol L}^{-1} \text{ H}_2\text{SO}_4$  +  $2 \text{ mol L}^{-1} \text{ ZnSO}_4$ ), and Solution D ( $0.04 \text{ mol L}^{-1} \text{ Na}_2\text{SO}_4$  +  $2 \text{ mol L}^{-1} \text{ ZnSO}_4$ ) with heavy water.

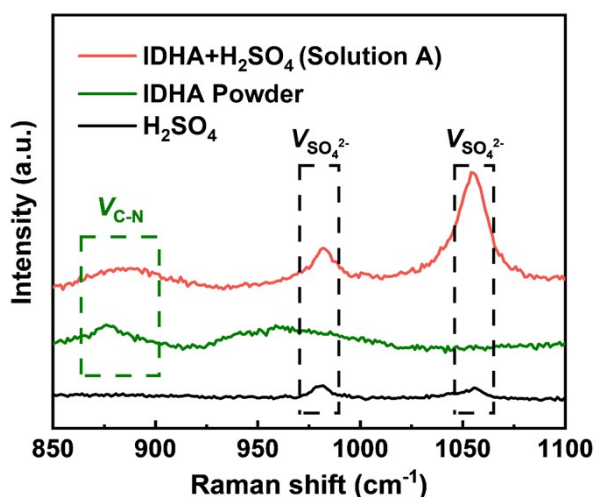

**Fig. S6.** Comparison of Raman spectra between Solution B, IDHA reagent, and  $\text{H}_2\text{SO}_4$ . It reveals that the three peaks in Solution B correspond to the C-N bond and sulfate groups, respectively.

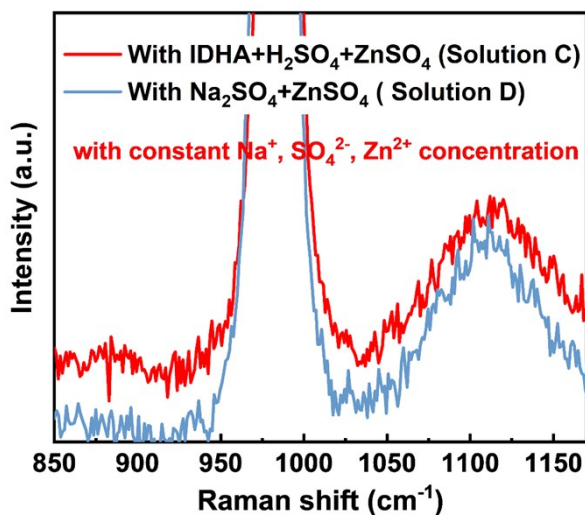

**Fig. S7.** Here is the enlarged spectrum for Figure 1g. This figure demonstrates that the peak at 1050-1200  $\text{cm}^{-1}$  still exists in the Solution C and D, but its intensity is masked by the main peak near 980  $\text{cm}^{-1}$ . Therefore, it can be proven that this peak corresponds to the  $\text{SO}_4^{2-}$ .



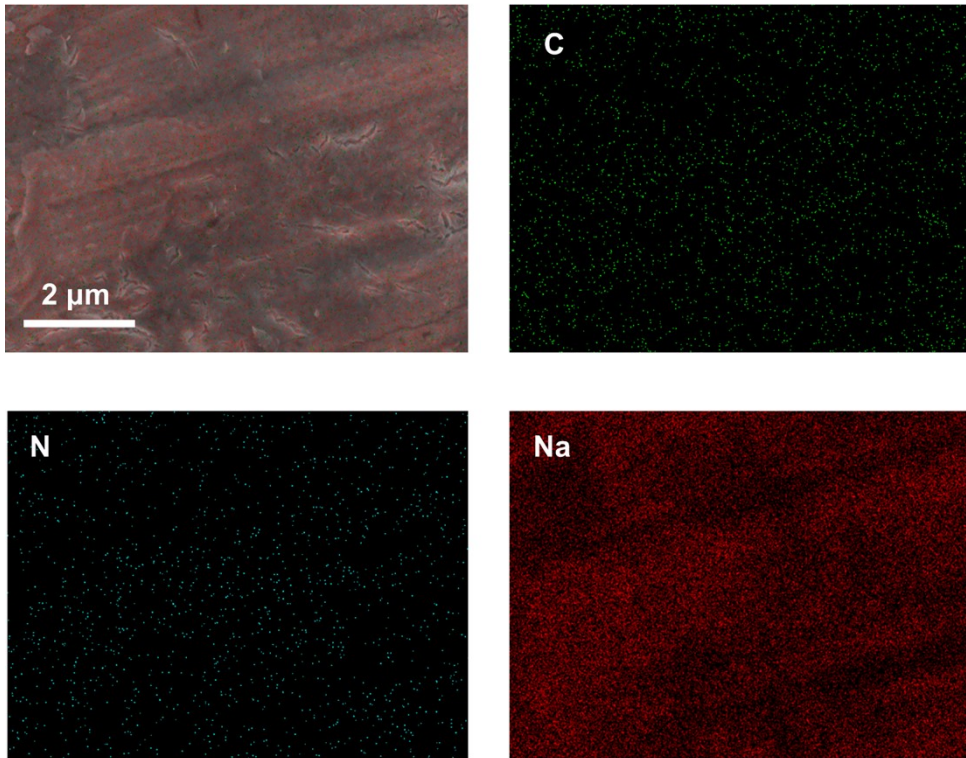

**Fig. S8.** EDS analysis of zinc foil after immersion in IDHA followed by rinsing.

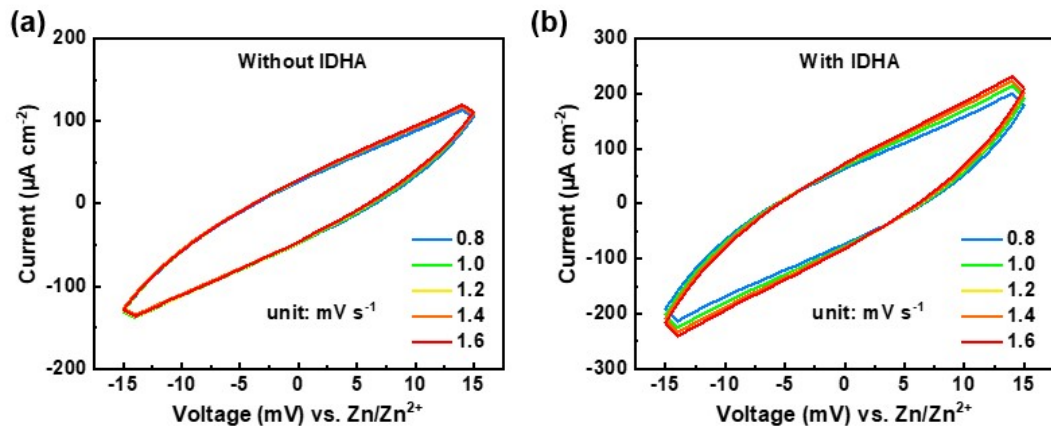

**Fig. S9.** CV curves of Zn//Zn symmetric batteries in a) ZnSO<sub>4</sub> and b) With IDHA electrolyte respectively.

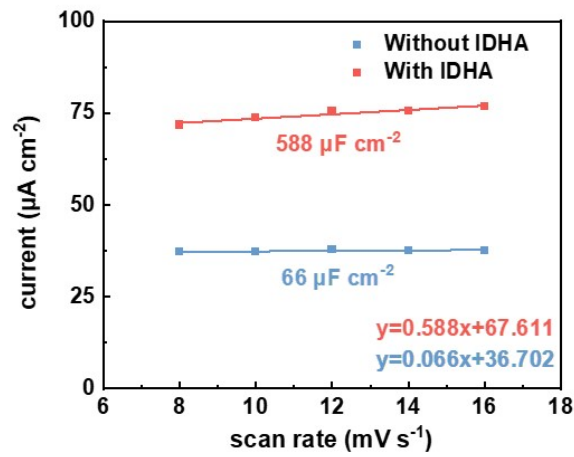

**Fig. S10.** EDL capacitance of Zn//Zn symmetric batteries with different electrolyte.

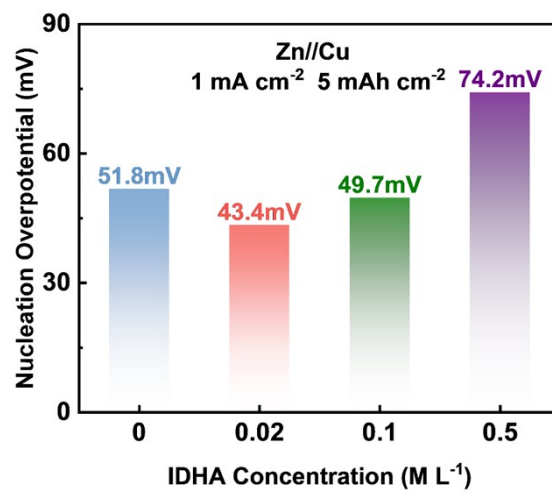

**Fig. S11.** Illustration of nucleation overpotential at various concentrations.

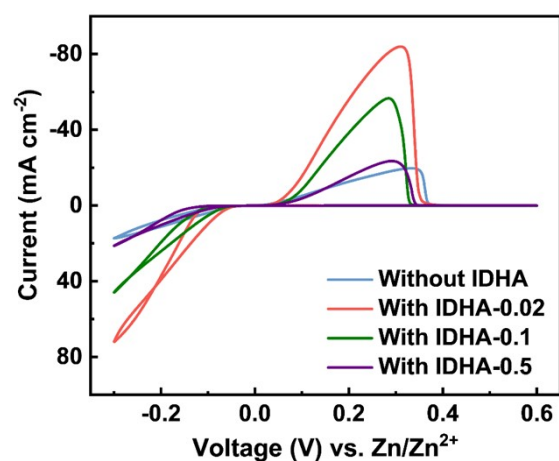

**Fig. S12.** Nucleation overpotential measured after assembling Zn//Cu asymmetric cells with different concentrations of IDHA additive.

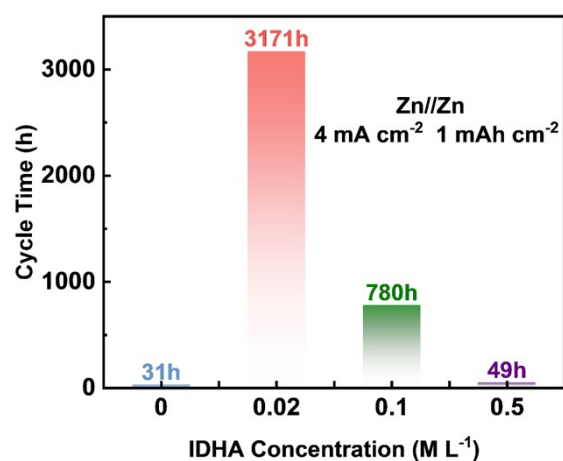

**Fig. S13.** Comparison of the cycling duration of Zn//Zn symmetric cells with different concentrations of IDHA at a current density of 4 mA cm<sup>-2</sup> and 1 mAh cm<sup>-2</sup>.

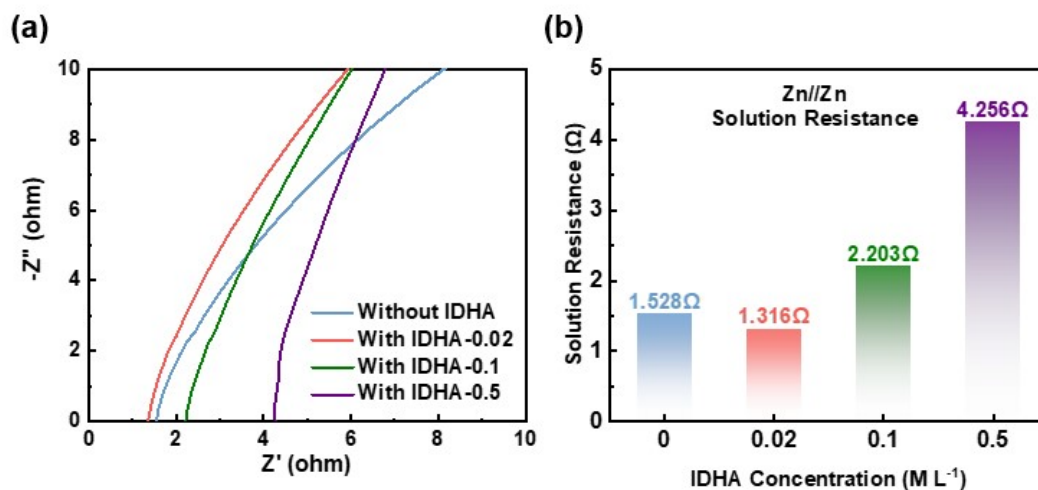

**Fig. S14.** (a) Locally magnified Nyquist plots of the Zn//Zn symmetrical cells in electrolytes adding different concentrations of IDHA (b) solution resistance for each system

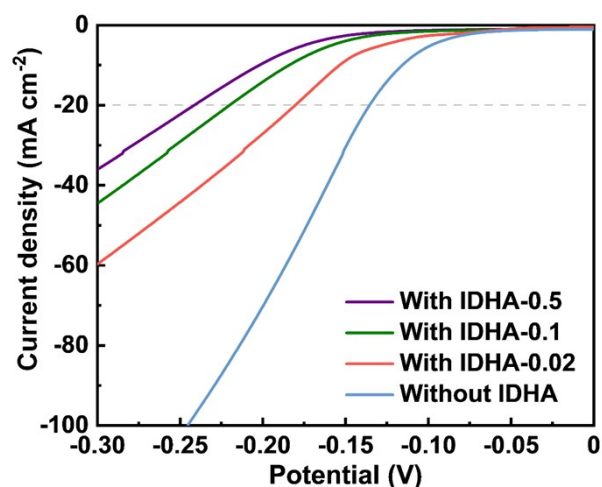

**Fig. S15.** The influence of different concentrations of IDHA on the hydrogen evolution performance (tested via linear sweep voltammetry).

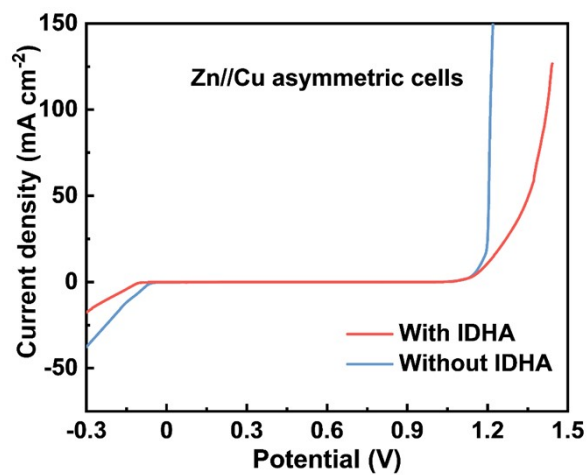

**Fig. S16.** The electrochemical stable window (ESW) measured for Zn//Cu asymmetric batteries.

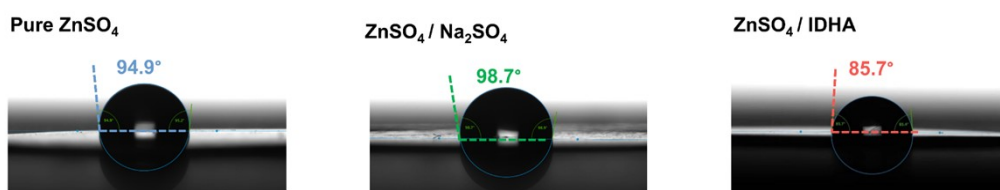

**Fig. S17.** Contact angles of three electrolytes with zinc foil.

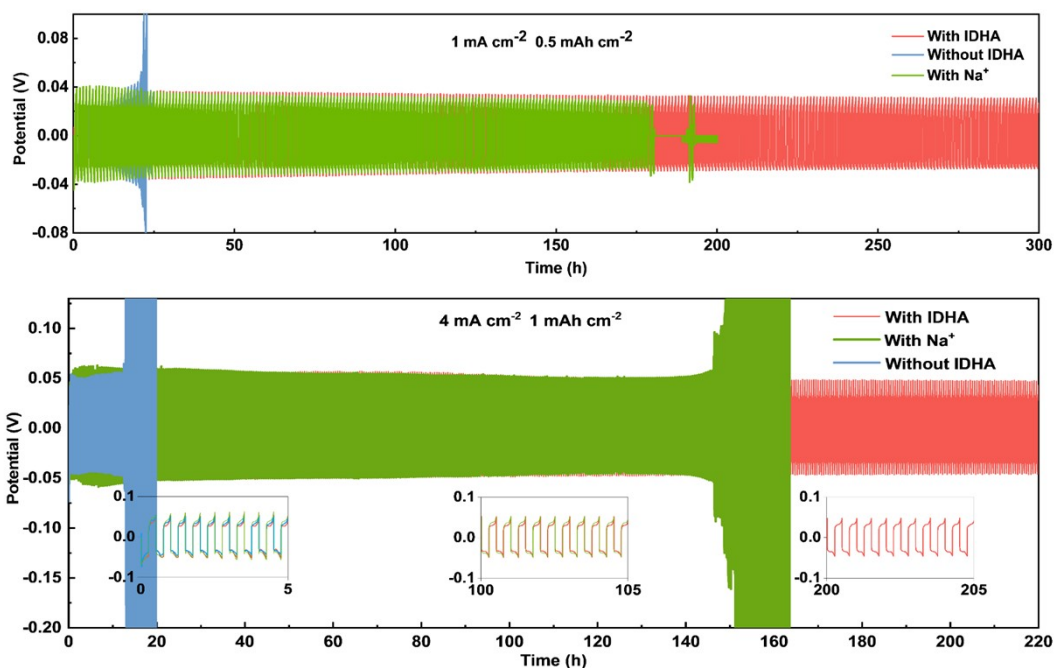

**Fig. S18.** Time-voltage curves of Zn//Zn symmetric cells with different electrolyte during cycling at a current density of  $1 \text{ mA cm}^{-2}$  and  $0.5 \text{ mAh cm}^{-2}$ ,  $4 \text{ mA cm}^{-2}$  and  $1 \text{ mAh cm}^{-2}$ .

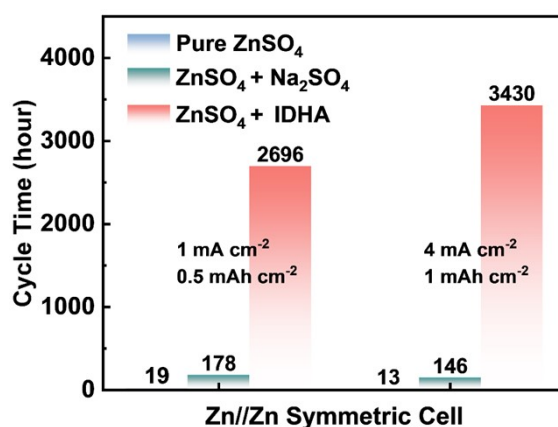

**Fig. S19.** Comparison of the cycling duration of Zn//Zn symmetric cells with different electrolyte at a current density of  $1 \text{ mA cm}^{-2}$  and  $0.5 \text{ mAh cm}^{-2}$ ,  $4 \text{ mA cm}^{-2}$  and  $1 \text{ mAh cm}^{-2}$ .

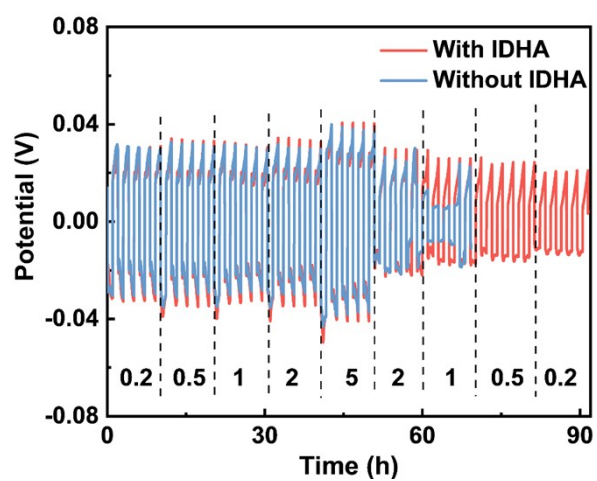

Fig. S20. Rate performance testing of Zn//Zn symmetric cells.

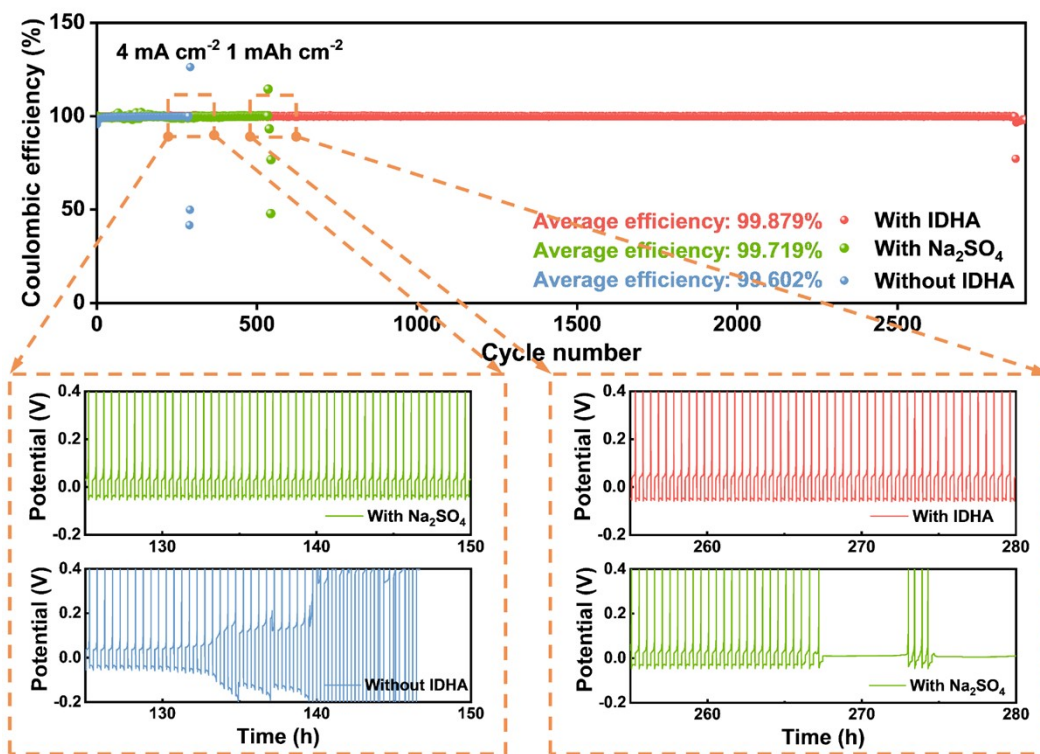

Fig. S21. Schematic of coulombic efficiency for Zn//Cu asymmetric cells with different electrolyte compositions, as well as time-voltage curves at the break point.

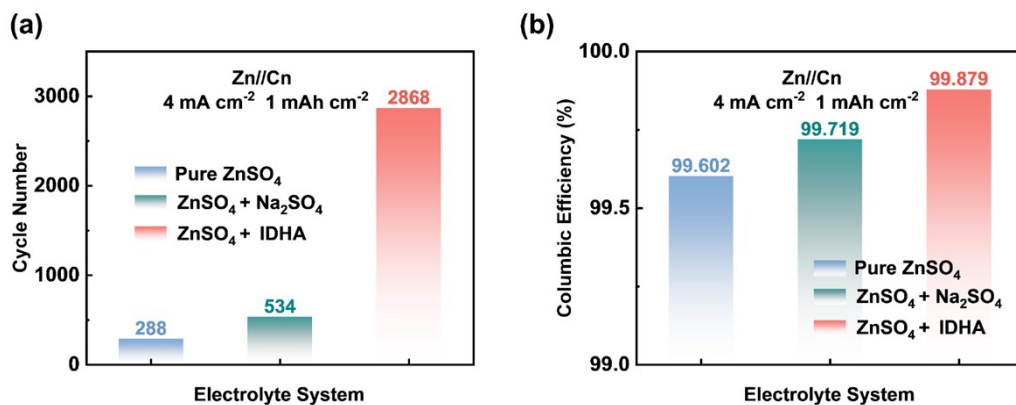

**Fig. S22.** Comparison of (a) the maximum cycle numbers and (b) coulombic efficiency for Zn//Cu asymmetric cells with different electrolyte compositions.

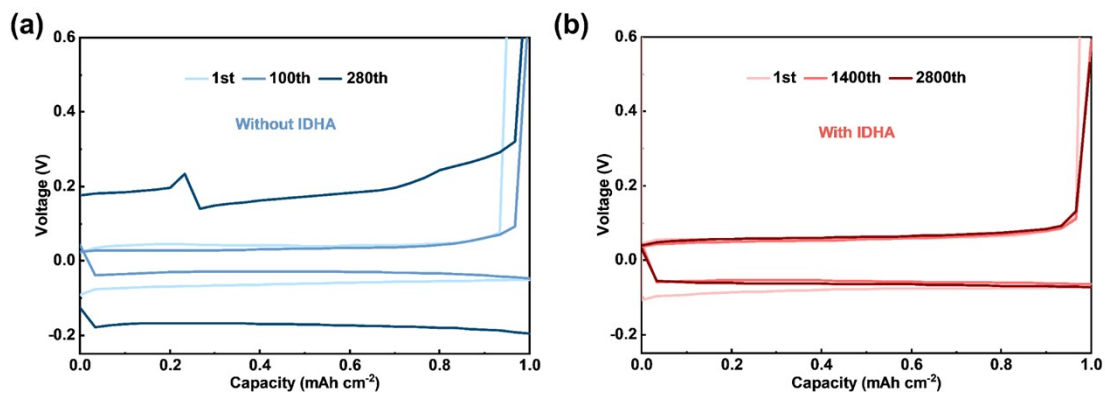

**Fig. S23.** The impact of adding IDHA on the capacity-voltage curve of Zn//Cu asymmetric cells. (4 mA cm<sup>-2</sup>, 1 mAh cm<sup>-2</sup>).



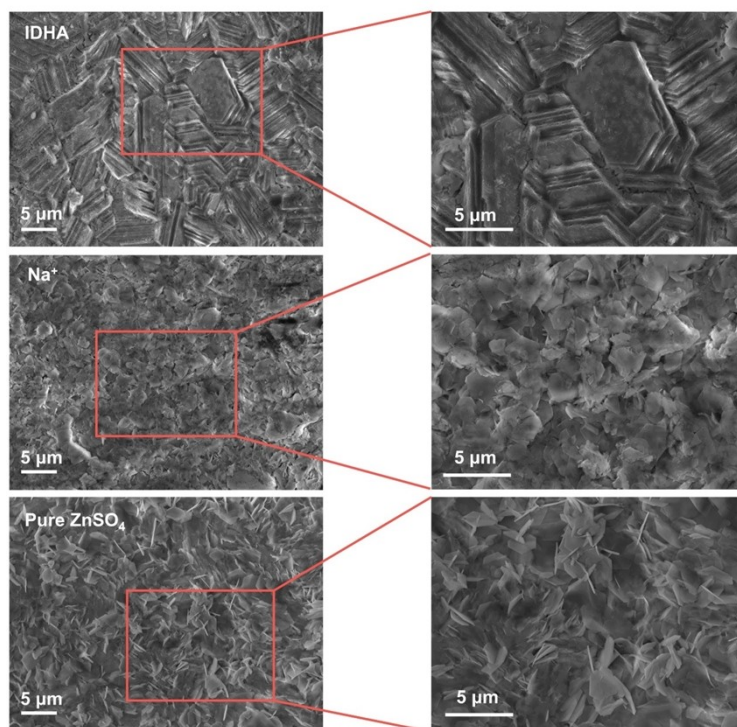

**Fig. S24.** Optical image of Zn electrode from the Zn//Zn symmetric cell after 10 cycles ( $1 \text{ mA cm}^{-2}$ ,  $1 \text{ mAh cm}^{-2}$ ).

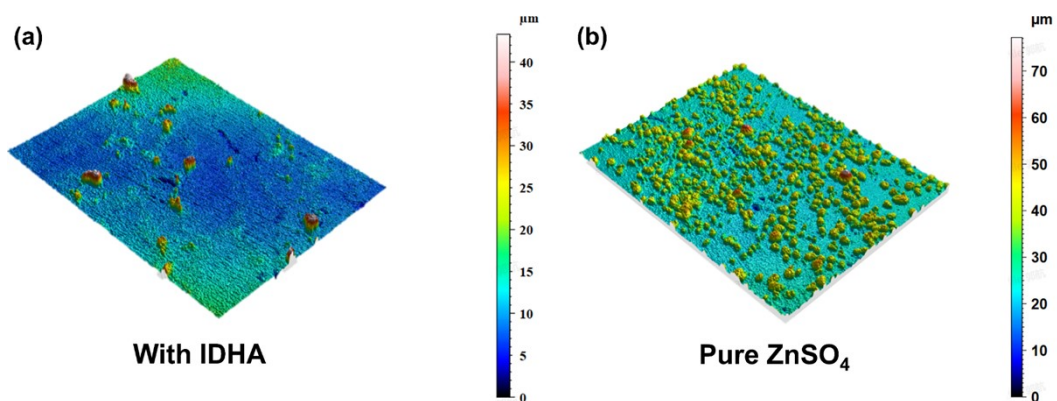

**Fig. S25.** Roughness after cycling 10 cycles at a current density of  $5 \text{ mA cm}^{-2}$ ,  $1 \text{ mAh cm}^{-2}$ .

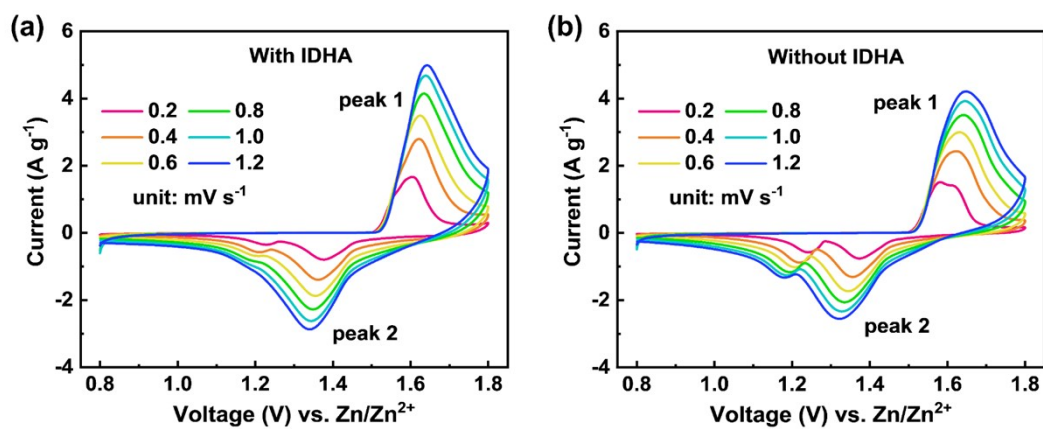

**Fig. S26.** CV test for Zn// $\delta$ -MnO<sub>2</sub> full-cells with different scan rate (0.2, 0.4, 0.6, 0.8, 1.0, 1.2 mV s<sup>-1</sup>).

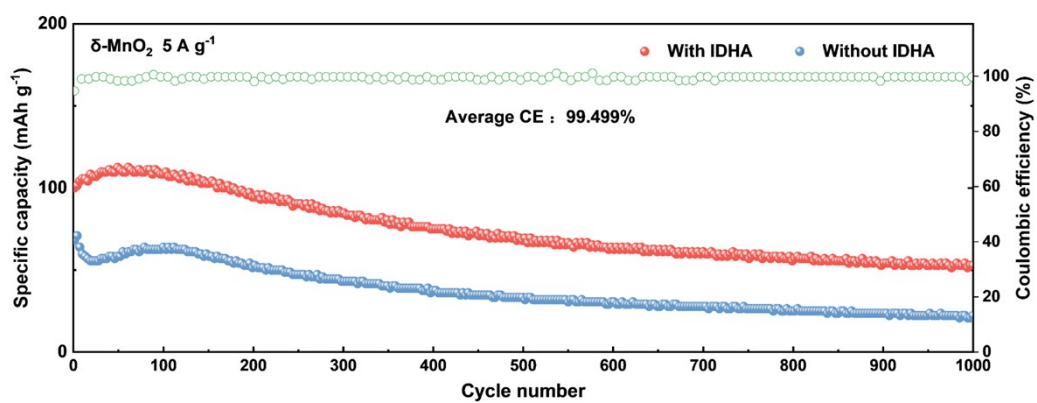

**Fig. S27.** Cycle testing of Zn// $\delta$ -MnO<sub>2</sub> full cells at a current density of 5 A g<sup>-1</sup>.

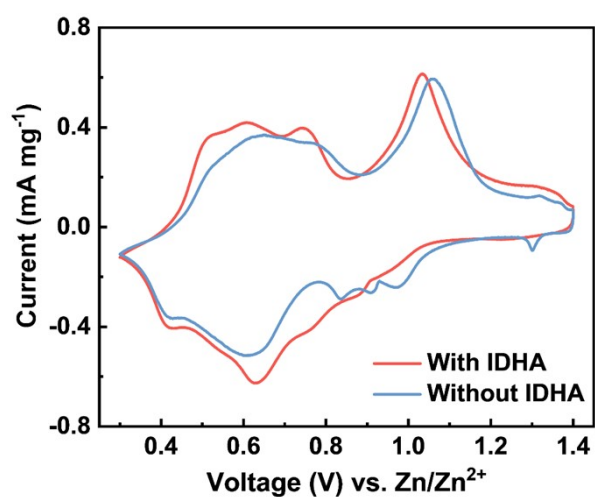

Fig. S28. CV testing of Zn/ $\text{NH}_4\text{V}_4\text{O}_{10}$  full cells.

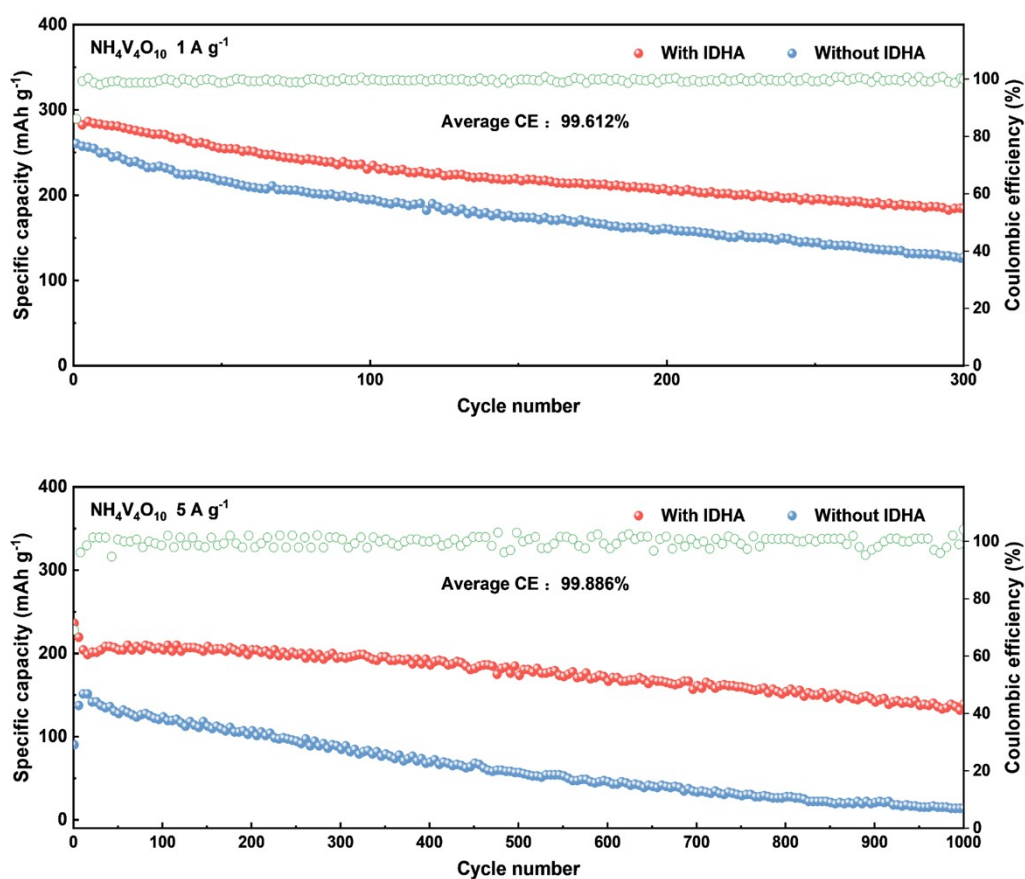

Fig. S29. Cycling performance of Zn/ $\text{NH}_4\text{V}_4\text{O}_{10}$  full cell at 1 and 5  $\text{A g}^{-1}$

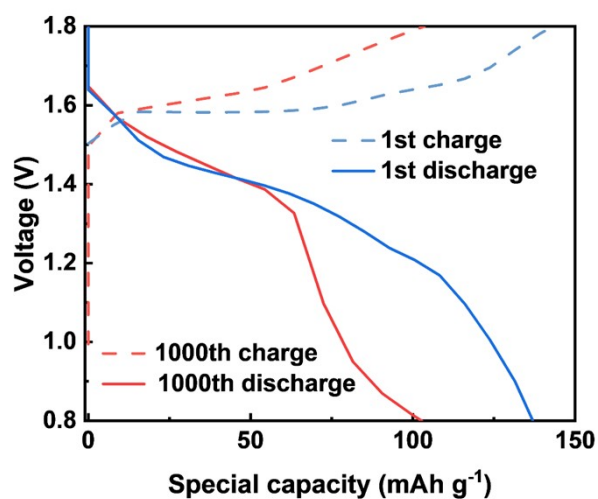

**Fig. S30.** The GCD curves of Zn// $\delta$ -MnO<sub>2</sub> pouch cells with IDHA additive at the first and 1000th cycle.

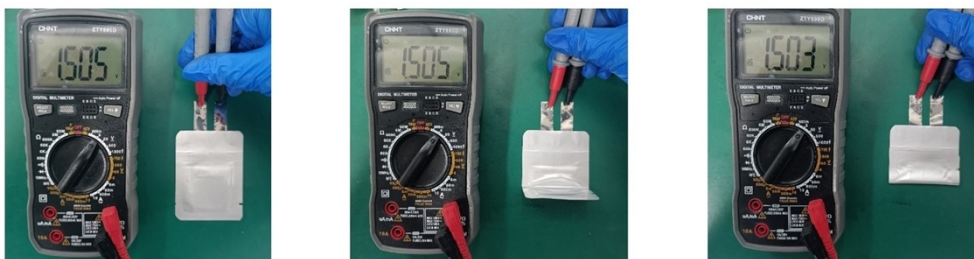

**Fig. S31.** The effect of different levels of folding on the voltage of pouch cells. Demonstrating the potential for flexible electronics applications.

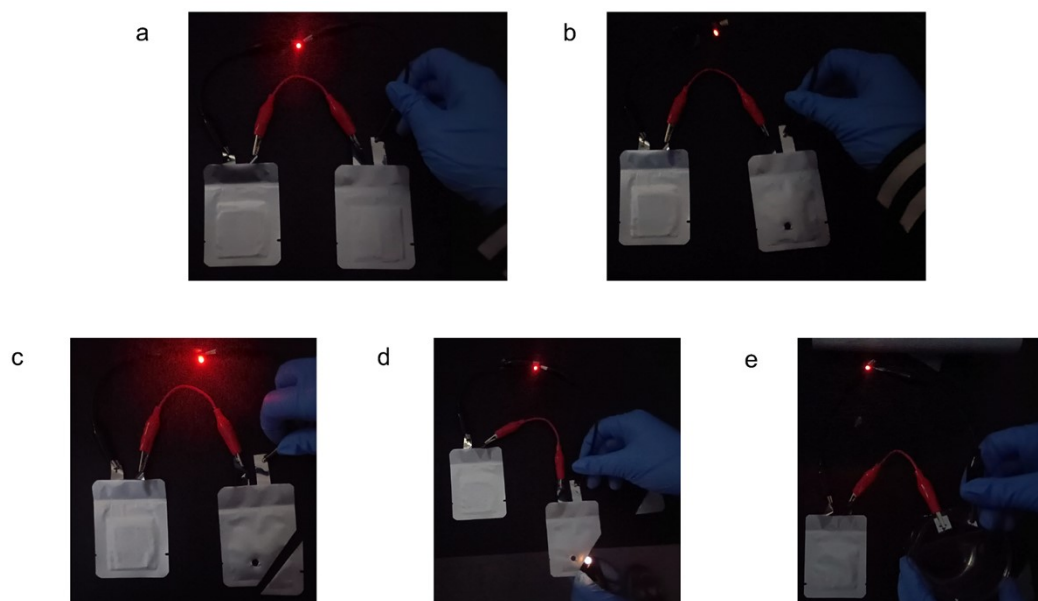

**Fig. S32.** Safety testing of pouch cells:a) Initial state b) Puncture c) Cutting d) Burning e) Immersion situation

**Tab. S1.** Performance comparison of symmetric Zn//Zn cells from the previously reported works involving electrolyte additives and our work.

| Electrolytes                                                                                   | Current density/Areal capacity (mA cm <sup>-2</sup> /mAh cm <sup>-2</sup> ) | Lifespan (h) | CPC (Ah cm <sup>-2</sup> ) | Refs. |
|------------------------------------------------------------------------------------------------|-----------------------------------------------------------------------------|--------------|----------------------------|-------|
| 2 M Zn SO <sub>4</sub> +50 vol% PG                                                             | 0.5/0.5                                                                     | 3500         | 0.875                      | [3]   |
|                                                                                                | 1/1                                                                         | 1000         | 0.5                        |       |
| 3 M ZnSO <sub>4</sub> in H <sub>2</sub> O/68 vol% EG                                           | 0.5/0.5                                                                     | 2268         | 0.667                      | [4]   |
| ZnSO <sub>4</sub> +5 vol% NMP                                                                  | 1/1                                                                         | 540          | 0.27                       | [5]   |
| ZnCl <sub>2</sub> : Zn(OAc) <sub>2</sub> = 10:6                                                | 0.2/0.2                                                                     | 1200         | 0.12                       | [6]   |
| 2.5 M Zn(OTf) <sub>2</sub> +0.04 wt% POV                                                       | 0.5/0.25                                                                    | 1000         | 0.5                        | [7]   |
| 1:4 M Zn/Li-70:30 wt% PEG/H <sub>2</sub> O                                                     | 0.25/0.4                                                                    | 500          | 0.125                      | [8]   |
| 2 M ZnSO <sub>4</sub> +0.0085 M La(NO <sub>3</sub> ) <sub>3</sub>                              | 1/1                                                                         | 1200         | 0.6                        | [9]   |
| 0.01 M Ce <sub>2</sub> (SO <sub>4</sub> ) <sub>3</sub> in ZnSO <sub>4</sub>                    | 1/1                                                                         | 400          | 0.2                        | [10]  |
| 2 M ZnSO <sub>4</sub> in glycerol/water (50/50)                                                | 1/1                                                                         | 1500         | 0.9                        | [11]  |
|                                                                                                | 2/6                                                                         | 900          |                            |       |
| 2 M ZnSO <sub>4</sub> +0.08 M ZnF <sub>2</sub>                                                 | 1/1                                                                         | 600          | 0.3                        | [12]  |
| 2 M ZnSO <sub>4</sub> +5 mM vanilli                                                            | 1/1                                                                         | 1000         | 0.5                        | [13]  |
| 1 M ZnSO <sub>4</sub> +4 M EMImCl                                                              | 1/1                                                                         | 500          | 0.25                       | [14]  |
| 1 M ZnSO <sub>4</sub> +0.1 M TSC                                                               | 5/1.25                                                                      | 200          | 0.5                        | [15]  |
| 3 M Zn(CF <sub>3</sub> SO <sub>3</sub> ) <sub>2</sub> +20 mM Zn(NO <sub>3</sub> ) <sub>2</sub> | 0.5/0.5                                                                     | 1200         | 0.3                        | [16]  |
| 7.6 M ZnCl <sub>2</sub> +0.05 M SnCl <sub>2</sub>                                              | 3/3                                                                         | 500          | 0.75                       | [17]  |
| 2 M ZnSO <sub>4</sub> +1 vol% DME                                                              | 2/2                                                                         | 380          | 0.38                       | [18]  |

---

|                                           |      |      |      |              |
|-------------------------------------------|------|------|------|--------------|
| 3 M ZnSO <sub>4</sub> +10 mM $\alpha$ -CD | 5/5  | 200  | 0.5  | [19]         |
|                                           | 10/1 | 160  | 0.8  |              |
| 2 M ZnSO <sub>4</sub> +0.02 M IDHA        | 4/1  | 3430 | 6.86 | This<br>work |

---

## Reference

- [1] J. Yin, R. Zhu, L. Xia, H. Liu, Y. Gao, Z. H. Gan, X. Feng, M. H. Wang, G. D. Meng, Y. Q. Su, Y. H. Cheng, X. Xu, *J. Mater. Chem. A*. 2023, 11, 11436-11444.
- [2] B. Y. Tang, J. Zhou, G. Z. Fang, F. Liu, C. Y. Zhu, C. Wang, A. Q. Pan, S. Q. Liang, *J. Mater. Chem. A*. 2019, 7, 940-945.
- [3] J. Li, S. Zhou, Y. Chen, X. Meng, A. Azizi, Q. He, H. Li, L. Chen, C. Han, A. Pan, *Adv. Funct. Mater.* 2023, 33, 2307201.
- [4] R. Qin, Y. Wang, M. Zhang, Y. Wang, S. Ding, A. Song, H. Yi, L. Yang, Y. Song, Y. Cui, J. Liu, Z. Wang, S. Li, Q. Zhao, F. Pan, *Nano Energy* 2021, 80, 105478.
- [5] T. C. Li, Y. Lim, X. L. Li, S. Luo, C. Lin, D. Fang, S. Xia, Y. Wang, H. Y. Yang, *Advanced Energy Materials*, 2022, 12, 2103231.
- [6] M. Yang, J. Zhu, S. Bi, R. Wang, Z. Niu, *Advanced Materials* 2022, 34, 2201744.
- [7] K. Yang, Y. Y. Hu, T. S. Zhang, B. Y. Wang, J. X. Qin, N. X. Li, Z. W. Zhao, J. W. Zhao, D. L. Chao, *Adv. Energy Mater.* 2022, 12, 2202671.
- [8] D. E. Ciurduc, C. de la Cruz, N. Patil, A. Mavrandonakis, R. Marcilla, *Energy Storage Mater.* 2022, 53, 532.
- [9] R. R. Zhao, H. F. Wang, H. R. Du, Y. Yang, Z. H. Gao, L. Qie, Y. H. Huang, *Nat. Commun.* 2022, 13, 3252.
- [10] Y. Li, P. Wu, W. Zhong, C. Xie, Y. Xie, Q. Zhang, D. Sun, Y. Tang, H. Wang, *Energy & Environmental Science* 2021, 14, 5563.
- [11] Y. J. Zhang, M. Zhu, K. Wu, F. F. Yu, G. Y. Wang, G. Xu, M. H. Wu, H. K. Liu, S. X. Dou, C. Wu, *J. Mater. Chem. A* 2021, 9, 4253.
- [12] Y. An, Y. Tian, K. Zhang, Y. Liu, C. Liu, S. Xiong, J. Feng, Y. Qian, *Adv. Funct. Mater.* 2021, 31, 2101886.
- [13] K. Zhao, F. Liu, G. Fan, J. Liu, M. Yu, Z. Yan, N. Zhang, F. Cheng, *ACS Appl. Mater. Interfaces* 2021, 13, 47650.
- [14] Q. Zhang, Y. Ma, Y. Lu, X. Zhou, L. Lin, L. Li, Z. Yan, Q. Zhao, K. Zhang, J. Chen, *Angew. Chem., Int. Ed.* 2021, 60, 23357.
- [15] N. Wang, S. Zhai, Y. Ma, X. Tan, K. Jiang, W. Zhong, W. Zhang, N. Chen, W. Chen, S. Li, G. Han, Z. Li, *Energy Storage Mater.* 2021, 43, 585.
- [16] D. Li, L. Cao, T. Deng, S. Liu, C. Wang, *Angew. Chem., Int. Ed.* 2021, 60, 13035.
- [17] L. Cao, D. Li, F. A. Soto, V. Ponce, B. Zhang, L. Ma, T. Deng, J. M. Seminario, E. Hu, X. Q. Yang, P. B. Balbuena, C. Wang, *Angew. Chem., Int. Ed.* 2021, 60, 18845.
- [18] J. Cui, X. Liu, Y. Xie, K. Wu, Y. Wang, Y. Liu, J. Zhang, J. Yi, Y. Xia, *Mater. Today Energy* 2020, 18, 100563.
- [19] K. Zhao, G. L. Fan, J. D. Liu, F. M. Liu, J. H. Li, X. Z. Zhou, Y. X. Ni, M. Yu, Y. M. Zhang, H. Su, Q. H. Liu, F. Y. Cheng, *J. Am. Chem. Soc.* 2022, 144, 11129.
